# Supplementary material
Source: Research Square preprint supplement (doi:10.21203/rs.3.rs-9265755/v1)
Supplement: Supplementary file 1 [file 139bf2a53f5e881230b09bb9.docx]

**Supplementary Material**

**Table S1.** Total RNA purity and concentration.

| **TIME OF TREATMENT** | **SAMPLE** | **[ng/µL]** | **260/280** | **260/230** |
| --- | --- | --- | --- | --- |
| ***3 hours*** | *Untreated Control* | 429. 6 | 2.00 | 1.80 |
|  | *FN* | 531.4 | 2.02 | 1.74 |
|  | *ES* | 530.0 | 2.01 | 1.94 |
|  | *NES* | 494.5 | 1.96 | 1.71 |
|  | *S* | 296.0 | 1.97 | 1.70 |
|  | *Y* | 304.7 | 1.99 | 2.00 |
| ***12 hours*** | *Untreated Control* | 443.2 | 1.96 | 1.45 |
|  | *FN* | 573.1 | 1.95 | 1.92 |
|  | *ES* | 384.5 | 1.97 | 2.08 |
|  | *NES* | 461.9 | 1.99 | 1.96 |
|  | *S* | 411.2 | 1.97 | 2.08 |
|  | *Y* | 655.1 | 2.01 | 1.76 |

Values are expressed as means of at least two independent experiments, each performed in triplicate.

**Table S2.** qRT-PCRgene primer list.

| GENE ID | FORWARD SEQUENCE | REVERSE SEQUENCE |
| --- | --- | --- |
| *DMT1* | 5'-AGCTCCACCATGACAGGAACCT-3' | 5'-TGGCAATAGAGCGAGTCAGAACC-3' |
| *DMT1/1A-IRE(+)* | 5'-TGGCTTATCTGGGCTTTGTG-3' | 5'-CACACTGGCTCTGATGGC TA-3' |
| *FTH1* | 5'-TGAAGCTGCAGAACCAACGAGG-3' | 5'-GCACACTCCATTGCATTCAGCC-3' |
| *GAPDH* | 5'-GTCTCCTCTGACTTCAACAGCG-3' | 5'-ACCACCCTGTTGCTGTAGCCAA-3' |
| *SLC40A1* | 5'-GAGACAAGTCCTGAATCTGTGCC-3' | 5'-TTCTTGCAGCAACTGTGTCACAG-3' |
| *SOD2* | 5'-CTGGACAAACCTCAGCCCTAAC-3' | 5'-AACCTGAGCCTTGGACACCAAC-3' |

*DMT1, FTH1, GAPDH* and *SOD2* human qPCR primer pairs were used according to the following PCR program: Activation: 50 °C for 2 min; Stage 2: pre-soak: 95 °C for 10 min; Stage 3: Denaturation: 95 °C for 15 sec, Annealing: 60°C for 1 min; Stage 4: Melting curve: 95°C for 15 sec, 60°C for 15 sec, 95°C for 15 sec.

*DMT1/1A-IRE(+)* human qPCR primer pair was used according to the following PCR program: Stage 1: Initial Denaturation: 95 °C for 30 sec; Stage 2: Denaturation: 95 °C for 10 sec, Annealing: 60°C for 30 sec; Stage 3: Melting curve: 95°C for 15 sec, 60°C for 1 min, 95°C for 15 sec.
